1 **Synthesis of oxyfunctionalized NSAID metabolites by microbial biocatalysts**

2 Jan M. Klenk <sup>a</sup>, Lisa Kontny <sup>a\*</sup>, Bernd A. Nebel <sup>a</sup>, Bernhard Hauer <sup>a#</sup>

3

4 <sup>a</sup>Institute of Biochemistry and Technical Biochemistry, University of Stuttgart,  
5 Allmandring 31, 70569 Stuttgart, Germany

6

7 Running Head: NSAID oxyfunctionalization by microbial biocatalysts

8

9 #Address correspondence to Bernhard Hauer, [bernhard.hauer@itb.uni-stuttgart.de](mailto:bernhard.hauer@itb.uni-stuttgart.de); phone:  
10 +49 711 685 63193; fax: +49 711 685 63196.

11 \*Present address: Lisa Kontny, Marabu GmbH, Tamm, Germany.

12

13 Abbreviations: GC, gas chromatography; HPLC, high-performance liquid  
14 chromatography; MS, mass spectrometry; NMR, nuclear magnetic resonance; NSAID,  
15 non-steroidal anti-inflammatory drug; PEG, potato-extract-glucose; P450, cytochrome  
16 P450 monooxygenase; P450 BM3, cytochrome P450 from *Bacillus megaterium*; P450  
17 RhF, cytochrome P450 from *Rhodococcus* sp. strain NCIMB 9784.

## 18 **Abstract**

19 The synthesis of valuable metabolites and degradation intermediates of drugs, like non-  
20 steroidal anti-inflammatory drugs (NSAIDs), are substantially for toxicological and  
21 environmental studies, but efficient synthesis strategies and the metabolite availability are  
22 still challenging aspects. To overcome these bottlenecks filamentous fungi as microbial  
23 biocatalysts were applied. Different NSAIDs like diclofenac, ibuprofen, naproxen and  
24 mefenamic acid could be oxyfunctionalized to produce human metabolites in isolated  
25 yields of up to 99% using 1 g L<sup>-1</sup> of substrate. Thereby the biotransformations using  
26 *Beauveria bassiana*, *Clitocybe nebularis* or *Mucor hiemalis* surpass previous reported  
27 chemical, microbial and P450-based routes in terms of efficiency. In addition to different  
28 hydroxylated compounds of diclofenac, a novel metabolite, 3',4'-dihydroxydiclofenac, has  
29 been catalyzed by *B. bassiana* and the responsible P450s were identified by proteome  
30 analysis. The applied filamentous fungi present an interesting alternative, microbial  
31 biocatalysts platform for the production of valuable oxyfunctionalized drug metabolites.

32

## 33 **Importance**

34 The occurrence of pharmaceutically active compounds, such as diclofenac and its  
35 metabolites, in the environment, in particular in aquatic systems, is of increasing concern  
36 because of the increased application of drugs. Standards of putative metabolites are  
37 therefore necessary for environmental studies. Moreover, pharmaceutical research and  
38 development requires assessment of the bioavailability, toxicity and metabolic fate of  
39 potential new drugs to ensure its safety for users and the environment. Since most of the  
40 reactions in the early pharmacokinetics of drugs are oxyfunctionalizations catalysed by

41 P450s, oxyfunctionalized metabolites are of major interest. However, to assess these  
42 metabolites chemical synthesis often suffer from multistep reactions, toxic substances,  
43 polluting conditions and achieve only low regioselectivity. Biocatalysis can contribute to  
44 this by using microbial cell factories. The significance of our research is to complement or  
45 even exceed synthetic methods for the production of oxyfunctionalized drug metabolites.

46

47 Keywords: Biotransformation; Filamentous fungi; Microbial biocatalysts; NSAIDs;  
48 Oxyfunctionalized metabolites

49

## 50 **Introduction**

51 Next to chemical processes, biotechnology routes can play a significant role for the access  
52 to pharmaceutically active substances and their metabolites. Metabolites and degradation  
53 intermediates can have major environmental implications, which can lead to unwanted side  
54 reactions in nature and mammals. Due to the fact that numerous drug metabolites are  
55 detected in higher amounts in different habitats, thus detailed environmental and  
56 toxicological studies are necessary. These findings induced that the FDA (Food and Drug  
57 Administration) issued guidelines for metabolites in drug testing, setting a limit of 10% in  
58 2008.

59 Approximately 80% of all reactions in the early pharmacokinetics of drugs (phase I  
60 reactions) are P450-catalyzed (1, 2). Therefore, oxyfunctionalized metabolites are often  
61 major degradation intermediates of potential toxic endogenous and exogenous compounds  
62 in mammals and nature. For further approval of new drugs, knowledge about potential  
63 metabolism intermediates and their availability for toxicological studies are obligatory (3–

64 5). As a very present example, a molecule like diclofenac (**1**), a widespread non-steroidal  
65 anti-inflammatory drug (NSAID), and its already known hydroxylated degradation  
66 metabolites 4'- and 5-hydroxydiclofenac (**2** and **3**) pose an environmental problem due to  
67 their low degradability (6, 7). Thereby, the request for particular drug metabolites increases  
68 simultaneously with the number of newly developed drugs, to study pharmacokinetic and  
69 toxic effects caused by metabolism (8, 9). Due to limited availability and often time as well  
70 as cost elaborating chemical synthesis routes, the value of drug metabolites can reach up  
71 to several hundred dollars per milligram. As mentioned above, the chemical synthesis of  
72 human metabolites such as 4'- and 5-hydroxydiclofenac (**2** and **3**) for toxicological studies  
73 is tedious and has only been achieved in low yields linked with high by-product formation  
74 (10–12). To complement synthetic methods, microbial processes with heterologous  
75 expressed P450s and wild-type organisms have emerged as an valuable alternative to  
76 chemical syntheses (13, 14).

77 Most of the previous studies focused on heterologous expressed human P450s which can  
78 produce the corresponding metabolites detectable in the human body (15). One example is  
79 CYP2C9 that was recombinant produced in different hosts and finally used for the  
80 production of 468 mg L<sup>-1</sup> of 4'-hydroxydiclofenac (**2**) (14, 16). Furthermore, the low  
81 activities and selectivities of the wild type P450 BM3 were improved by directed evolution  
82 resulting in variants which led to a significantly enhanced oxidation capability of NSAIDs  
83 (17–20). In this context we recently published the scale-up of the self-sufficient P450 RhF  
84 (21). The enzyme was heterologous expressed and implemented as whole cell system,  
85 whereby 5-hydroxydiclofenac (**3**) was produced exclusively in high titers of up to  
86 357 mg L<sup>-1</sup>. However, high yields with NSAIDs are rather the exception, because often the

87 product yields obtained with P450s or microorganisms are in the lower milligram range  
88 (17, 22–26). Therefore, the biotechnological synthesis of such oxyfunctionalized  
89 compounds for environmental and toxicological studies remains expandable.

90 Based on our previous hydroxylation experiment studies with diclofenac (**1**) as substrate,  
91 we further extended the biocatalyst platform for NSAID oxyfunctionalizations by a  
92 spectrum of available biocatalysts. In this work, we intended to identify new microbial  
93 biocatalysts able to catalyze NSAID metabolites and degradation intermediates in high  
94 yields, to provide those molecules for further drug development and toxicological studies.

95

## 96 **Materials and Methods**

### 97 *Materials*

98 The chemicals and media used in this study were obtained from Fluka (Buchs,  
99 Switzerland), Sigma-Aldrich (St. Louis, Missouri, USA) Alfa-Aesar (Ward Hill,  
100 Massachusetts, USA) and Carl-Roth (Karlsruhe, Germany) in highest available purity  
101 degrees. The KOD HS polymerase was from Novagene Inc. (Madison, Wisconsin, USA).

102

### 103 *Isolation of genomic DNA from eukaryotes*

104 For the isolation of genomic DNA from eukaryotes, precultures of the various filamentous  
105 fungi were cultured on PEG broth (potato-extract-glucose broth) as medium for about  
106 3 days at 27°C and 180 rpm. An initial cell lysis was achieved by centrifugation of the  
107 cultures, freezing at -80°C for 10 min and crushing the frozen mycelia with a mortar.  
108 Subsequently, the samples were isolated according to the manufacturer's instructions using

109 the ZR Fungal/Bacterial DNA Microprep™ kit (Zymo Research Corp., Irvine, California,  
110 USA). The elution of the DNA was carried out with 25 µL ddH<sub>2</sub>O.

111

### 112 *Polymerase chain reaction (PCR) for the amplification of DNA fragments*

113 The PCR was used to selectively amplify DNA fragments of genomic DNA based on the  
114 primers ITS4 (5'-TCCTCCGCTTATTGATATGC-3') and ITS5  
115 (5'-GGAAGTAAAAGTCGTAACAAGG-3') or LR0R  
116 (5'-ACCCGCTGAACTTAAGC-3') and LR5 (5'-TCCTGAGGGAACTTCG-3') as  
117 described by Schoch and coworkers in 2012 (27). For the elongation KOD HS Polymerase  
118 was used in 50 µL total volume using the components and programs as shown in TABLE  
119 S1 and S2.

120 The success of the PCR reactions was controlled by an agarose gel and the DNA fragments  
121 were then directly isolated (Figure S1). Therefore, the DNA fragments were visualized  
122 under UV light (366 nm) and cut out of the agarose gel with a scalpel, weighed and treated  
123 with the Zymoclean Gel DNA Recovery Kit (Zymo Research Corp., Irvine, California,  
124 USA) according to the manufacturer's instructions. The isolated DNA was subsequently  
125 eluted with 20 µL ddH<sub>2</sub>O. For the analysis of the DNA samples, a volume of 20 µL and a  
126 concentration of 50 - 70 ng µL<sup>-1</sup> were used. The sequencing was done by GATC Biotech  
127 AG (Konstanz, Germany) using the primers of the PCR amplification.

128

### 129 *Proteome analysis of Beauveria bassiana*

130 For the cell disruption of *Beauveria bassiana*, liquid cultures were centrifuged and the  
131 mycelia subsequently washed with ddH<sub>2</sub>O over a filter paper and dried. In a Petri dish, the

132 samples were lyophilized (Alpha 2-4 LD plus, Martin Christ Gefriertrocknungsanlagen  
133 GmbH, Osterode am Harz, Germany), to rub this later as a first partial disruption with the  
134 mortar. 35-50 mg of powder was mixed with an equivalent volume of glass beads (0.1-  
135 0.25 mm) and 1 mL urea buffer (28) (25 mM Tris/HCl pH 6.8, 9 M urea, 1% SDS, 1 mM  
136 EDTA, direct before use 0.7 M DTT). Subsequently, the cell disruption samples were  
137 heated to 95°C for 2 min, shaken for 1 min by vortexing and heated again at 95°C for  
138 1 min. After separation of the glass beads by short centrifugation, the DNA was sheared  
139 by sonication (Branson Sonifier 250 equipped with a microtip: 1/8 "diameter, Danbury,  
140 Connecticut, USA, pulse: output 2, duty cycle: 35%) for 30 s.

141 A 3-day PEG broth preculture was used to inoculate 100 mL PEG broth with 1/75 volume  
142 of preculture. The biotransformations were started after 24 h incubation with the addition  
143 of 0.5 g L<sup>-1</sup> of the substrates or glucose as a reference. The reactions were stopped after  
144 first products were detected (48 h for (*R*)-2-phenoxypropionic acid and 68 h for diclofenac  
145 (**1**)). The cells were then lysed as described above and the proteins of the samples analyzed  
146 and diluted as a whole cell suspension on a 10% and a 15% SDS-polyacrylamide gel.

147 The proteome analysis was carried out at the mass spectrometry service unit in Hohenheim  
148 (Germany, group of Dr. Pfannstiel) using an ACQUITY nano-UPLC system (Waters  
149 GmbH, Milford, USA) directly coupled to a LTQ-Orbitrap XL hybrid mass spectrometer  
150 (Thermo Fisher Scientific, Bremen, Germany) with following minor changes as described  
151 previously (29). Tryptic digests were separated on a 25 cm x 75 μm x 1.7 μm BEH 130 C<sub>18</sub>  
152 reversed phase column (Waters GmbH) with gradient elution performed from 1% ACN to  
153 50% ACN in 0.1% formic acid within 120 min. Identification of the proteins was based on  
154 a global NCBI database search applying the MASCOT search algorithm. The mass

155 spectrometry proteomics data have been deposited to the ProteomeXchange Consortium  
156 via the PRIDE (30) partner repository with the dataset identifier PXD009664 and  
157 10.6019/PXD009664.

158

#### 159 *Preparative biotransformations*

160 The filamentous fungi applied in this work were cultured in PEG broth, in which a better  
161 growth could be achieved in comparison to sabouraud medium. On PEG-agar, the hyphae  
162 were transferred once a month and incubated at 27°C for several days (*M. hiemalis*: 3 days,  
163 *B. bassiana*: 4 days, *C. nebularis*: 5 days). *B. bassiana* used in this work was modified by  
164 UV radiation to allow yeast-like growth in liquid culture (31). 50 mL of PEG broth was  
165 once inoculated with a loop tip, whereas *M. hiemalis* and *C. nebularis* were inoculated  
166 several times with hyphae to slightly disperse and therefore minimize lumpy mycelial  
167 growth. The fungi were cultured for 4 days at 27°C and 180 rpm and then transferred to  
168 50 – 400 ml main cultures which were inoculated with 1/75 volume (*B. bassiana*) or with  
169 the filtered mycelia (*M. hiemalis* and *C. nebularis*) of the preculture. After 24 h of  
170 incubation, the biotransformations were started with 1 g L<sup>-1</sup> substrate (50 g L<sup>-1</sup> stock  
171 solution in DMSO) or in the case of diclofenac (**1**) with 0.6 g L<sup>-1</sup> for 72 h or 144 h,  
172 respectively. At regular intervals, 500 µL samples were taken, centrifuged and the  
173 supernatant was used for analysis by GC-FID, HPLC-DAD or LC-MS. The  
174 biotransformations were carried out in biological duplicates starting from different agar  
175 plates.

176

177



178 *HPLC and LC-MS analytic*

179 Diclofenac (**1**) and its metabolites were analyzed by HPLC and LC-MS as described  
180 elsewhere (21).

181

182 *GC analytic*

183 Naproxen (**6**), ibuprofen (**8**) and mefenamic acid (**12**) were analyzed by gas  
184 chromatography. For this purpose, the samples (500  $\mu\text{L}$ ) were centrifuged and 250  $\mu\text{L}$  of  
185 the supernatant initially acidified by 10  $\mu\text{L}$  HCl prior extraction with the same volume of  
186 MTBE. The organic phase was then evaporated on a Genevac EZ-2 Plus Evaporator  
187 (Ipswich, UK) and resuspended in a mix of 50% MTBE and 50% BSTFA + TCMS (99: 1).  
188 The derivatization of the samples (150  $\mu\text{L}$ ) was carried out in GC vials at 70°C for 30 min.  
189 GC analysis was performed on a Shimadzu GC-2010 equipped with an AOC-20i  
190 autoinjector (Shimadzu, Nakagyo-ku, Japan). The samples were injected with a split of 20  
191 (1  $\mu\text{L}$  injection volume, injector temperature 250°C, carrier gas  $\text{H}_2$ , 30  $\text{cm s}^{-1}$ ) and  
192 separated by a DB-5 column (30 m x 0.25 mm x 0.25  $\mu\text{m}$ , Agilent Technologies, Santa  
193 Clara, California, USA). The analytes were detected by a flame ionization detector (FID,  
194 detector temperature 330°C). For **6** and **12** the column temperature was maintained at  
195 150°C for 1 min, increased to 280°C at a rate of 10°C  $\text{min}^{-1}$  and held for 1 min, raised to  
196 320°C at a rate of 65°C  $\text{min}^{-1}$  and held for 3 min. For **8** the column temperature was  
197 maintained at 90°C for 1 min, increased to 280°C at a rate of 12°C  $\text{min}^{-1}$  and held for 1 min,  
198 raised to 320°C at a rate of 65°C  $\text{min}^{-1}$  and held for 3 min.

199 For initial product identification, the samples were run on GC-2010 GC-MS system  
200 equipped with Shimadzu GCMS-QP2010 detector and AOC-5000 autoinjector (Shimadzu,

201 Nakagyo-ku, Japan) and helium as carrier gas (linear velocity 30 cm s<sup>-1</sup>). The analytes were  
202 separated on a DB-5 column and measured with identical temperature programs for  
203 GC-FID analysis. For the recording of the mass spectra, an ionization (EI, Electron  
204 Ionization) of 70 eV, an interface temperature of 250°C and an ion source temperature of  
205 200°C was used. The detection of the mass fragments was finally carried out in the scan  
206 mode from 40 to 600 m/z.

207

### 208 *Product purification and identification*

209 For product purification, the supernatant of the duplicates (2 x 50 mL or 2 x 400 mL) from  
210 preparative biotransformations were extracted twice with the identical volume of MTBE.  
211 In the case of biotransformations with substrate **6**, **8** and **12**, the supernatant was  
212 additionally acidified with HCl and afterwards extracted with MTBE. The organic phases  
213 were combined, evaporated to dryness and the residues were dissolved in 10 mL of  
214 acetonitrile and stored at 4°C for further use. The batches were finally purified by reverse  
215 phase semi-preparative HPLC on an Agilent 1200 System (St. Clara, California, USA)  
216 equipped with a G1311A quaternary pump, a HIP AS G1367B autosampler (1200 µL  
217 loop), a G1315D DAD detector and an analytical G1364C fraction collector. The  
218 separation of the analytes (injection volume: 1000 µL) was ensured using a Trentec  
219 Reprosil® 100-5 C18 column (250 × 20 mm, 5 µm) from Dr. Maisch GmbH (Ammerbuch-  
220 Entringen, Germany). The mobile phases A and B were composed of water containing  
221 0.1% formic acid and acetonitrile, respectively. Elution was done in a gradient mode at a  
222 flow rate of 5 mL min<sup>-1</sup> and a column temperature of 20°C using following program:  
223 85% A (0 min), 20% A (63 min), 20% A (67 min), 85% A (67.01 min), 85% A (83 min).

224 The elution of substrates and products were followed spectrophotometrically at a  
225 wavelength of 272 nm for **1**, 232 nm for **6**, 224 nm for **8** and 275 nm for **12**. Identical  
226 product fractions were combined, the solvent mixture of acetonitrile and water removed on  
227 a rotary evaporator and completely dried by a nitrogen gas flow. The remaining solid  
228 products were finally dissolved in *d*-methanol or *d*-DMSO and analyzed by <sup>1</sup>H- and <sup>13</sup>C-  
229 NMR to clarify the chemical structures. The purity of all samples were determined by GC  
230 or HPLC.

231

### 232 *NMR measurements*

233 For the characterization of the purified products, NMR spectroscopy was used. <sup>1</sup>H-,  
234 <sup>1</sup>H-COSY- and <sup>13</sup>C-NMR spectra were recorded using a Bruker Avance 500 spectrometer  
235 at 500.15 and 125.76 MHz, respectively, or a Bruker Ascend 700 <sup>TM</sup> spectrometer at 700.36  
236 and 176.10 MHz respectively (both Bruker, Billerica, Massachusetts, USA). The chemical  
237 shift  $\delta$  was measured in ppm (parts per million) and referred to TMS (tetramethylsilane)  
238  $\delta = 0$  ppm as a standard. Unless otherwise stated, 10 mg of the product was used for NMR  
239 analysis. The NMR spectra are given in the supplemental material (Figures S2-S9).

240 5-Hydroxydiclofenac: <sup>1</sup>H-NMR (500 MHz, CD<sub>3</sub>OD):  $\delta$  (ppm) 3.71 (s, 2H; C-7), 6.37 (d, *J*  
241 = 8.8 Hz, 1H; C-3), 6.55 (dd, *J* = 8.8, 2.5 Hz, 1H; C-4), 6.72 (d, *J* = 2.5 Hz, 1H; C-6), 6.96  
242 (t, *J* = 7.8 Hz, 1H; C-4'), 7.34 (d, *J* = 7.8 Hz 2H; C-3' and 5').

243 <sup>13</sup>C-NMR (126 MHz, CD<sub>3</sub>OD):  $\delta$  (ppm) 39.2 (C7), 115.3 (ArCH-4), 118.3 (ArCH-6), 121.9  
244 (ArCH-3), 124.1 (ArCH-4'), 129.2 (ArC-2), 129.3 (ArC-1'), 130.1 (2ArCH-3' and 5'),  
245 136.4 (ArC-1), 140.5 (2CCl), 154.1 (C-OH), 175.8 (COOH).

246 5-Hydroxyquinoneimine:  $^1\text{H-NMR}$  (500 MHz,  $(\text{CD}_3)_2\text{SO}$ ):  $\delta$  (ppm) 3.69 (s, 2H; C-7), 6.59  
247 (dd,  $J = 10.1, 2.5$  Hz, 1H; C-4), 6.74 (d,  $J = 10.1$  Hz, 1H; C-3), 6.80 (d,  $J = 2.5$  Hz, 1H; C-  
248 6), 7.25 (t,  $J = 8.2$  Hz, 1H; C-4'), 7.58 (d,  $J = 7.6$  Hz, 2H; C-3' and 5').  
249  $^{13}\text{C-NMR}$  (126 MHz,  $(\text{CD}_3)_2\text{SO}$ ):  $\delta$  (ppm) 36.3 (C7), 123.1 (ArC), 126.6 (ArC), 128.6  
250 (ArC), 129.1 (ArC), 133.1 (ArC), 133.5 (ArC), 143.4 (ArC-1'), 145.1 (ArC-1), 160.4 (ArC-  
251 2), 170.6 (COOH), 186.9 (C=O).  
252 4'-Hydroxydiclofenac:  $^1\text{H-NMR}$  (500 MHz,  $\text{CD}_3\text{OD}$ ):  $\delta$  (ppm) 3.7 (s, 2H, C-7), 6.26 (d, 1H,  
253  $J = 8.0$  Hz, C-3), 6.8 (t, 1H,  $J = 7.4$ , C-5), 6.88 (s, 2H, C-3' and C-5'), 7.02 (t, 1H,  $J = 7.5$ ,  
254 C-4), 7.17 (d, 1H,  $J = 7.4$ , C-6).  
255  $^1\text{H-COSY}$  (500 MHz,  $\text{CD}_3\text{OD}$ ): (7.17)  $\delta$  (ppm) 3.7, 6.8, (7.02)  $\delta$  (ppm) 6.26, 6.8.  
256  $^{13}\text{C-NMR}$  (126 MHz,  $\text{CD}_3\text{OD}$ ):  $\delta$  (ppm) 39.2 (C7'), 116.4 (ArC), 116.9 (2ArC), 121.3  
257 (ArC), 124.2 (ArC), 128.9 (ArC), 130.5 (ArC), 131.9 (2ArC), 133.7 (ArC), 145.5 (ArC),  
258 156.3 (ArC-4'), 175.9 (COOH).  
259 3',4'-Dihydroxydiclofenac:  $^1\text{H NMR}$  (700 MHz,  $\text{CD}_3\text{OD}$ ):  $\delta$  (ppm) 3.72 (s, 2H, C-7), 6.29  
260 (d, 1H,  $J = 8.1$  Hz, C-3), 6.80 (t, 1H,  $J = 7.6$ , C-5), 6.86 (s, 1H, C-5'), 7.02 (t, 1H,  $J = 7.9$   
261 Hz, C-4), 7.17 (d, 1H, 3.5 Hz, C-6).  
262 6-*o*-Desmethylnaproxen:  $^1\text{H-NMR}$  (500 MHz,  $\text{CD}_3\text{OD}$ ):  $\delta$  (ppm) 1.50 (d, 3H,  $J = 7.0$  Hz,  
263 C-3), 3.81 (q, 1H,  $J = 7.2$  Hz, C-2), 7.03 - 7.09 (m, 2H, C-8 and C-10) 7.35 (d, 1H,  $J = 8.5$   
264 Hz, C-11), 7.59 (d, 1H,  $J = 8.4$  Hz, C-13), 7.64 (s, 1H, C-5), 7.67 (d, 1H,  $J = 8.8$  Hz, C-6).  
265  $^{13}\text{C-NMR}$  (126 MHz,  $\text{CD}_3\text{OD}$ ):  $\delta$  (ppm) 15.4 (C7), 113.2 (ArC), 114.5 (ArC), 117.9 (ArC),  
266 127.3 (ArC), 127.5 (ArC), 128.7 (ArC), 133.3 (ArC), 134.9 (ArC), 135.1 (ArC), 135.2  
267 (ArC), 141.6 (ArC), 150.2 (ArC), 172.1 (COOH).

268 2-Hydroxyibuprofen:  $^1\text{H-NMR}$  (500 MHz,  $\text{CD}_3\text{OD}$ ):  $\delta$  (ppm) 1.16 (s, 6H, C-12 and C-13),  
269 1.43 (d, 3H,  $J = 7.2$  Hz, C-3), 2.72 (s, 2H, C-10), 3.68 (q, 1H,  $J = 7.2$  Hz, C-2), 7.18 (d,  
270 2H,  $J = 8.0$  Hz, C-5 and C-9), 7.22 (d, 2H,  $J = 7.9$  Hz, C-6 and C-8).

271  $^{13}\text{C-NMR}$  (126 MHz,  $\text{CD}_3\text{OD}$ ):  $\delta$  (ppm) 19.1 (C3), 29.2 (C12 and C13), 46.4 (C2), 50.3  
272 (C10), 71.8 (C11), 128.0 (2x ArC), 131.9 (2 x ArC), 138.5 and 140.3 (C4 and C7), 178.6  
273 (COOH).

274 1-Hydroxyibuprofen:  $^1\text{H-NMR}$  (700 MHz,  $(\text{CD}_3)_2\text{SO}$ ):  $\delta$  (ppm) 0.73 (d, 3H,  $J = 6.8$  Hz, C-  
275 12) 0.85 (d, 3H,  $J = 6.7$  Hz, C-13), 1.32 (d, 3H,  $J = 7.1$  Hz, C-3), 1.77 (oct, 1H,  $J = 16.4$   
276 Hz, C-11), 3.58 (q, 1H,  $J = 7.2$  Hz, C-2), 4.19 (d, 1H,  $J = 6.2$ , C-10), 7.19 (d, 2H,  $J = 8.5$   
277 Hz, C-5 and C-9), 7.21 (d, 2H,  $J = 8.6$  Hz, C-6 and C-8).

278  $^{13}\text{C-NMR}$  (176 MHz,  $(\text{CD}_3)_2\text{SO}$ ):  $\delta$  (ppm) 17.4 (C3), 18.2 and 18.5 (C12 and C13), 34.3  
279 (C11), 44.4 (C2), 76.8 (C10), 125.9 and 126.1 (4 x ArC), 139.6 and 142.6 (C4 and C7),  
280 175.3 (COOH).

281 1,2-Dihydroxyibuprofen:  $^1\text{H-NMR}$  (500 MHz,  $\text{CD}_3\text{OD}$ ):  $\delta$  (ppm) 1.12 (s, 6H, C-12 and C-  
282 13), 1.43 (d, 3H,  $J = 3.4$  Hz, C-3), 3.69 (q, 1H,  $J = 7.2$  Hz, C-2), 4.43 (s, 1H, C-10), 7.26  
283 (d, 2H,  $J = 7.8$  Hz, C-5 and C-9), 7.34 (d, 2H,  $J = 8.0$  Hz, C-6 and C-8).

284  $^{13}\text{C-NMR}$  (126 MHz,  $\text{CD}_3\text{OD}$ ):  $\delta$  (ppm) 19.1 (C3), 25.3 and 26.0 (C12 and C13), 46.7  
285 (C2), 74.0 (C11), 81.6 (C10), 127.8 (2 x ArC), 129.2 (2 x ArC), 141.7 and 141.8 (C4 and  
286 C7). COOH group is barely visible.

287 3'-Hydroxymethylmefenamic acid:  $^1\text{H-NMR}$  (500 MHz,  $(\text{CD}_3)_2\text{SO}$ ):  $\delta$  (ppm) 2.11 (s, 3H,  
288 C-8'), 4.53 (s, 2H, C-7'), 6.68 – 6.73 (m, 2H, C-2 and C-4), 7.18 – 7.25 (m, 3H, C-4', 5'  
289 and 6'), 7.31 (t, 1H,  $J = 7.5$  Hz, C-3), 7.89 (d, 1H,  $J = 7.5$  Hz, C-5).

290  $^{13}\text{C}$ -NMR (126 MHz,  $(\text{CD}_3)_2\text{SO}$ ):  $\delta$  (ppm) 12.4 ( $\text{C}8'$ ), 61.3 ( $\text{C}7'$ ), 111.6 (ArC), 112.9  
291 (ArC), 116.3 (2ArC-3 and 4'), 122.6 (ArC), 123.5 (ArC), 125.9 (ArC), 129.9 (ArC), 131.6  
292 (ArC), 134.0 (ArC), 138.2 (ArC), 141.8 (ArC), 170.0 (COOH).

293 3'-Carboxymefenamic acid:  $^1\text{H}$ -NMR (500 MHz,  $\text{CD}_3\text{OD}$ ):  $\delta$  (ppm) 2.43 (s, 3H, C-8'),  
294 6.71 (t, 1H,  $J = 7.5$  Hz, C-4), 6.75 (d, 1H,  $J = 4.3$  Hz, C-2), 7.28 (q, 2H,  $J = 7.3$  Hz, C-3,  
295 and C-5'), 7.46 (d, 1H,  $J = 7.8$  Hz, C-4'), 7.62 (d, 1H,  $J = 7.8$  Hz, C-6'), 7.98 (d, 1H,  $J =$   
296 8.0 Hz, C-5).

297  $^{13}\text{C}$ -NMR (126 MHz,  $\text{CD}_3\text{OD}$ ):  $\delta$  (ppm) 15.4 ( $\text{C}8'$ ), 113.2 (ArC), 114.5 (ArC), 117.9  
298 (ArC), 127.3 (ArC), 127.5 (ArC), 128.7 (ArC), 133.3 (ArC), 134.9 (ArC), 135.1 (ArC),  
299 135.2 (ArC), 141.6 (ArC), 150.2 (ArC), 172.1 (2 x COOH).

300

## 301 **Results and Discussion**

### 302 *Identification of microbial biocatalysts for NSAID oxyfunctionalizations*

303 In addition to the already published organism *Beauveria bassiana*, which is able to perform  
304 one of the most effective hydroxylation processes in biocatalysis, the production of (*R*)-2-  
305 (4-hydroxyphenoxy)propionic acid and a variety of other hydroxylation reactions (31, 32),  
306 we identified two other filamentous fungi as further novel NSAID accepting biocatalysts.  
307 One of these strains was isolated from soil samples close to Ludwigshafen (Germany)  
308 during previous diclofenac (**1**) degradation experiments (33). The third filamentous fungus  
309 was isolated by coincident as a contamination strain out of a 5-hydroxydiclofenac (**3**)  
310 standard, diluted in M9 minimal medium, after 1.5 years of aerobic incubation. Both fungi  
311 were assigned by the universal biomarkers LSU (28S nuclear ribosomal large subunit  
312 rRNA gene) and ITS (internal transcribed spacer). Sequence matching with the fungal

313 barcoding and the NCBI database revealed that one strain was > 99% consistent with the  
314 S1 organism *Clitocybe nebularis* (confirmed by LSU and ITS biomarkers). For the other  
315 organism, the LSU biomarker found a > 98% similarity with the S1 organism  
316 *Mucor hiemalis*.

### 317 *Biotransformations with diclofenac*

318 The fungi were cultivated in 400 mL PGE broth and the biotransformations were done in  
319 duplicates with a starting concentration of 0.6 g L<sup>-1</sup> diclofenac (**1**). The reaction was  
320 monitored over time by HPLC-DAD and stopped after 144 h (Figure 1). All products were  
321 purified by semi-preparative HPLC for further detailed structure identification by <sup>1</sup>H and  
322 <sup>13</sup>C NMR. Similar to the distribution of products in humans, the 4'-position (**2**) was  
323 favoured in the biotransformations with the fungi, which was also observed with P450s  
324 and microorganisms in previous studies (Scheme 1, Table 1). In comparison to  
325 *C. nebularis* which is able to catalyze a mixture of the metabolites 4'-hydroxydiclofenac  
326 (**2**, 60%), 5-hydroxydiclofenac (**3**, 30%) and the corresponding quinoneimine (**4**, 10%)  
327 with 50.6% isolated yield, *M. hiemalis* selectively oxyfunctionalized diclofenac (**1**)  
328 yielding 61.7% of 4'-hydroxydiclofenac (**2**) after purification. High isolated yields of  
329 55.3% were additionally achieved using *B. bassiana*. Next to the major product  
330 4'-hydroxydiclofenac (**2**, 90%), a 3',4'-dihydroxydiclofenac (**5**) metabolite was identified  
331 that has not been characterized and published yet. In studies concerning the fungi  
332 *Epicoccum nigrum* and *Cunninghamella elegans*, preparative biotransformations were  
333 performed resulting in product titers of 16 and 57 mg L<sup>-1</sup>, respectively (34, 35). In contrast,  
334 the filamentous fungi identified in the present work were able to obtain significantly higher  
335 values comparable with biotransformations using P450 RhF and P450 BM3 (Table 1).

336 *Proteome analysis of B. bassiana*

337 A common question that is often raised as a negative element for the use of microbial cell  
338 factories is which enzymes are involved in the detected biotransformation. In this respect,  
339 we aimed to identify 450s, which are responsible for the oxyfunctionalization of diclofenac  
340 (**1**) and (*R*)-2-phenoxypropionic acid in *B. bassiana* using omics studies. As a proof of  
341 concept, we analyzed biotransformation samples whether we can identify differences by a  
342 proteome analysis depending on the substrate. Therefore, samples of biotransformations  
343 with the corresponding substrates and glucose as negative control were processed to obtain  
344 the organisms proteome. By applying the proteome analysis clear evidence of P450s  
345 (implied by the number of detected and assigned fragments) which were upregulated with  
346 the specific substrates, were achieved drastically reducing the high number of 83 putative  
347 P450s in *B. bassiana* (36). With diclofenac (**1**) as substrate two P450s, CYP548A5 and  
348 CYP51F1, were exclusively expressed compared to the samples exposed with the other  
349 substrates (Table 2). In case of (*R*)-2-phenoxypropionic acid as substrate, CYP52A10  
350 seems to be strongly upregulated while CYP684A2 was induced exclusively. In  
351 eukaryotes, only one bifunctional NADPH-reductase serves as electron delivering partner  
352 that was also found in all samples. In this work, the proteome analysis has thus proved to  
353 be a targeted method for identifying involved proteins in eukaryotes that can subsequently  
354 lead to valuable new heterologous expressed biocatalysts.

355 *NSAID biotransformations applying the identified microbial biocatalysts*

356 To investigate the potential of the microbial biocatalysts further we increased the NSAID  
357 substrate scope of the fungi strains to oxyfunctionalize naproxen (**6**), ibuprofen (**8**) and  
358 mefenamic acid (**12**). In some cases, high titers and full conversion towards the investigated



359 NSAIDs were achieved. For example, *M. hiemalis* demethylated naproxen (**6**) to the human  
360 metabolite 6-*o*-desmethylnaproxen (**7**) with an isolated yield of over 99% using 1 g L<sup>-1</sup> of  
361 substrate (Scheme 2). In comparison the *in vitro* biotransformations with P450 BM3  
362 variants and the strain *A. niger* showed much lower selectivity and isolated yield (Table 1)  
363 (19, 20, 37).

364 Furthermore, *M. hiemalis* almost completely hydroxylated 1 g L<sup>-1</sup> ibuprofen (**8**) to the  
365 metabolites 2-hydroxyibuprofen (**9**, 90%) 1-hydroxyibuprofen (**10**, 2%), and the double  
366 hydroxylated secondary product 1,2-dihydroxyibuprofen (**11**, 8%) (Scheme 2). The highest  
367 product titer so far was achieved by a P450 BM3 variant *in vitro* with 0.4 g L<sup>-1</sup> of  
368 2-hydroxyibuprofen (**9**) (Table 1) (17, 20, 38). Microorganisms such as  
369 *Trametes versicolor* and *Nigospora sphaerica* or the P450s CYP2C9, CYP267A1 and B1  
370 had significantly lower product yields (> 30 g L<sup>-1</sup>) (25, 39–41). Using the anthranilic acid  
371 derivative mefenamic acid (**12**) as substrate, the highest activity was achieved by  
372 *B. bassiana* with an isolated yield of 48% at 1 g L<sup>-1</sup> substrate concentration (Scheme 2).  
373 Next to the 3'-hydroxymethylmefenamic acid (**13**) as main product (68%), the product  
374 3'-carboxymefenamic acid (**14**) was catalyzed. In humans, **12** is mainly converted to **13** by  
375 CYP2C9 which undergoes further oxidation to the carboxy metabolite **14** (42). An evolved  
376 P450 BM3 variant generated besides 3'-hydroxymethylmefenamic acid (**13**) the other  
377 human P450 catalyzed metabolites 4'- and 5-hydroxymefenamic acid (**20** and **21**) which  
378 are hydroxylated at the aromatic rings (18, 43). In this case, *in vitro* product titers of  
379 216 mg L<sup>-1</sup> were below those obtained with *B. bassiana* (Table 1). In degradation  
380 experiments, the wild-type organism *Phaenerochaete sordida* (white-rot fungus) also

381 produced different mefenamic acid metabolites with significantly lower yields of less than  
382 3 mg L<sup>-1</sup> (26).

383 Overall, the filamentous fungi of the present study achieved high product titers in the  
384 biotransformations with the NSAIDs. Applying a semi-preparative HPLC purification  
385 method, all NSAID metabolites could be isolated in high yields and high purities.  
386 Moreover, reproducible product titers were obtained at 50 mL or 400 mL scale exhibiting  
387 the possibility to further increase the yields by improving the cultivation and  
388 biotransformation procedure. One drawback of filamentous fungi as catalyst for  
389 biotransformations is their mycelial growth. This particular cell shape minimizes the  
390 possible surface to the medium and thus the mass transfer of substrate solubilized in the  
391 medium and the cells. Especially cells located inside the mycelia may therefore be unable  
392 to participate in biocatalysis, but against our expectation, the clump-forming organism  
393 *M. hiemalis* has achieved the highest yields so far.

394 Compared to already published biotechnological processes the total process time with the  
395 filamentous fungi of 4 days or 7 days for diclofenac (**1**), respectively, were in accordance  
396 with most of the studies (Table 1 and 2). However, a simple cultivation and  
397 biotransformation setup using fungi with less steps are main benefits, besides the achieved  
398 high product yields. In detail, compared to P450-based reactions, less requirements on the  
399 process were necessary since issues associated with an often complex P450 system like  
400 biocatalyst expression, stability or cofactor dependency are negligible.

401

402 In conclusion, the results of the present work demonstrate the potential of microbial  
403 biocatalysts for NSAID oxyfunctionalizations. Often, low activity, difficult handling, or

404 high by-product formation are illustrated as criteria against the use of microorganisms (40).  
405 In contrast, the microorganisms identified in this work are easy to cultivate, inexpensive  
406 and are able to produce high valued metabolites in promising yields. The applied and  
407 identified filamentous fungi serve with their versatile metabolism as an interesting platform  
408 for novel cell factories to produce valuable NSAID metabolites in an effective and cheap  
409 way or can help to develop new strategies in drug design.

410

#### 411 **Acknowledgements**

412 The research leading to these results has received funding from the European Union's  
413 Seventh Framework Programme for research, technological development and  
414 demonstration under grant agreements no 613849 (BIOOX). We also gratefully  
415 acknowledge financial support from the Landesgraduiertenförderung (LSFG) Baden-  
416 Württemberg. We thank Berit Würtz and Dr. Jens Pfannstiel for conduction and helpful  
417 advice concerning the proteome analysis.

418

#### 419 **References**

- 420 1. Bernhardt R. 2004. Cytochrome P450 : versatile Enzymsysteme mit Anwendungen  
421 in der Biotechnologie und Medizin. Mag Forsch 1:10–16.
- 422 2. Guengerich FP. 2008. Cytochrome P450 and Chemical Toxicology Cytochrome  
423 P450 and Chemical Toxicology. Chem Res Toxicol 21:70–83.
- 424 3. Guengerich F. 2006. Cytochrome P450s and other enzymes in drug metabolism and  
425 toxicity. AAPS J 8:E101–E111.
- 426 4. Naisbitt DJ, Sanderson LS, Meng X, Stachulski A V., Clarke SE, Park BK. 2007.

- 427 Investigation of the immunogenicity of diclofenac and diclofenac metabolites.  
428 Toxicol Lett 168:45–50.
- 429 5. den Braver MW, Zhang Y, Venkataraman H, Vermeulen NPE, Commandeur JNM.  
430 2016. Simulation of interindividual differences in inactivation of reactive para-  
431 benzoquinone imine metabolites of diclofenac by glutathione S-transferases in  
432 human liver cytosol. Toxicol Lett 255:52–62.
- 433 6. Langford K, Thomas K V. 2011. Input of selected human  
434 pharmaceuticalmetabolites into the Norwegian aquatic environment. J Environ  
435 Monit 13:416–421.
- 436 7. Richardson SD, Kimura SY. 2016. Water Analysis: Emerging Contaminants and  
437 Current Issues. Anal Chem 88:546–582.
- 438 8. Guengerich FP, MacDonald JS. 2007. Applying mechanisms of chemical toxicity to  
439 predict drug safety. Chem Res Toxicol 20:344–369.
- 440 9. Daily EB, Aquilante CL. 2009. Cytochrome P450 2C8 pharmacogenetics: a review  
441 of clinical studies. Pharmacogenomics 10:1489–1510.
- 442 10. Waterhouse I. 1999. Synthesis of deuterium labelled 4'-Hydroxydiclofenac. J Label  
443 Compd Radiopharm 42:1075–1083.
- 444 11. Kim SH, Kwon JH, Yoon SH. 2010. An improved synthesis of 4'-  
445 hydroxydiclofenac. Bull Korean Chem Soc 31:3007–3009.
- 446 12. Kenny JR, Maggs JL, Meng X, Sinnott D, Clarke SE, Park BK, Stachulski A V.  
447 2004. Syntheses and characterization of the acyl glucuronide and hydroxy  
448 metabolites of diclofenac. J Med Chem 47:2816–2825.
- 449 13. Urlacher VB, Girhard M. 2012. Cytochrome P450 monooxygenases: an update on

- 450 perspectives for synthetic application. *Trends Biotechnol* 30:26–36.
- 451 14. Drăgan CA, Peters FT, Bour P, Schwaninger AE, Schaan SM, Neunzig I, Widjaja  
452 M, Zapp J, Kraemer T, Maurer HH, Bureik M. 2011. Convenient gram-scale  
453 metabolite synthesis by engineered fission yeast strains expressing functional  
454 human P450 systems. *Appl Biochem Biotechnol* 163:965–980.
- 455 15. Geier M, Braun A, Emmerstorfer A, Pichler H, Glieder A. 2012. Production of  
456 human cytochrome P450 2D6 drug metabolites with recombinant microbes – a  
457 comparative study. *Biotechnol J* 7:1346–1358.
- 458 16. Vail RB, Homann MJ, Hanna I, Zaks A. 2005. Preparative synthesis of drug  
459 metabolites using human cytochrome P450s 3A4, 2C9 and 1A2 with NADPH-P450  
460 reductase expressed in *Escherichia coli*. *J Ind Microbiol Biotechnol* 32:67–74.
- 461 17. Tsotsou GE, Sideri A, Goyal A, Di Nardo G, Gilardi G. 2012. Identification of  
462 mutant Asp251Gly/Gln307His of cytochrome P450 BM3 for the generation of  
463 metabolites of diclofenac, ibuprofen and tolbutamide. *Chem - A Eur J* 18:3582–  
464 3588.
- 465 18. Venkataraman H, Verkade-Vreeker MCA, Capoferri L, Geerke DP, Vermeulen  
466 NPE, Commandeur JNM. 2014. Application of engineered cytochrome P450  
467 mutants as biocatalysts for the synthesis of benzylic and aromatic metabolites of  
468 fenamic acid NSAIDs. *Bioorganic Med Chem* 22:5613–5620.
- 469 19. Ren X, Yorke JA, Taylor E, Zhang T, Zhou W, Wong LL. 2015. Drug Oxidation by  
470 Cytochrome P450BM3 : Metabolite Synthesis and Discovering New P450 Reaction  
471 Types. *Chemistry* 21:15039–15047.
- 472 20. Rentmeister A, Brown TR, Snow CD, Carbone MN, Arnold FH. 2011. Engineered

- 473 Bacterial Mimics of Human Drug Metabolizing Enzyme CYP2C9. *ChemCatChem*  
474 3:1065–1071.
- 475 21. Klenk JM, Nebel BA, Porter JL, Kulig JK, Hussain SA, Richter SM, Tavanti M,  
476 Turner NJ, Hayes MA, Hauer B, Flitsch SL. 2017. The self-sufficient P450 RhF  
477 expressed in a whole cell system selectively catalyses the 5-hydroxylation of  
478 diclofenac. *Biotechnol J* 12:1–8.
- 479 22. Xu LH, Ikeda H, Liu L, Arakawa T, Wakagi T, Shoun H, Fushinobu S. 2015.  
480 Structural basis for the 4'-hydroxylation of diclofenac by a microbial cytochrome  
481 P450 monooxygenase. *Appl Microbiol Biotechnol* 99:3081–3091.
- 482 23. Marco-Urrea E, Pérez-Trujillo M, Cruz-Morató C, Caminal G, Vicent T. 2010.  
483 Degradation of the drug sodium diclofenac by *Trametes versicolor* pellets and  
484 identification of some intermediates by NMR. *J Hazard Mater* 176:836–842.
- 485 24. Ferrando-Climent L, Collado N, Buttiglieri G, Gros M, Rodriguez-Roda I,  
486 Rodriguez-Mozaz S, Barceló D. 2012. Comprehensive study of ibuprofen and its  
487 metabolites in activated sludge batch experiments and aquatic environment. *Sci*  
488 *Total Environ* 438:404–413.
- 489 25. Borges KB, De Oliveira ARM, Barth T, Jabor VAP, Pupo MT, Bonato PS. 2011.  
490 LC-MS-MS determination of ibuprofen, 2-hydroxyibuprofen enantiomers, and  
491 carboxyibuprofen stereoisomers for application in biotransformation studies  
492 employing endophytic fungi. *Anal Bioanal Chem* 399:915–925.
- 493 26. Hata T, Kawai S, Okamura H, Nishida T. 2010. Removal of diclofenac and  
494 mefenamic acid by the white rot fungus *Phanerochaete sordida* YK-624 and  
495 identification of their metabolites after fungal transformation. *Biodegradation*

496 21:681–689.

497 27. Schoch CL, Seifert K a., Huhndorf S, Robert V, Spouge JL, Levesque C a., Chen  
498 W, Consortium FB, Bolchacova E, Voigt K, Crous PW, Miller a. N, Wingfield MJ,  
499 Aime MC, An K-D, Bai F-Y, Barreto RW, Begerow D, Bergeron M-J, Blackwell  
500 M, Boekhout T, Bogale M, Boonyuen N, Burgaz a. R, Buyck B, Cai L, Cai Q,  
501 Cardinali G, Chaverri P, Coppins BJ, Crespo A, Cubas P, Cummings C, Damm U,  
502 De Beer ZW, de Hoog GS, Del-Prado R, Dentinger B, Dieguez-Uribeondo J,  
503 Divakar PK, Douglas B, Duenas M, Duong T a., Eberhardt U, Edwards JE, Elshahed  
504 MS, Fliegerova K, Furtado M, Garcia M a., Ge Z-W, Griffith GW, Griffiths K,  
505 Groenewald JZ, Groenewald M, Grube M, Gryzenhout M, Guo L-D, Hagen F,  
506 Hambleton S, Hamelin RC, Hansen K, Harrold P, Heller G, Herrera C, Hirayama  
507 K, Hirooka Y, Ho H-M, Hoffmann K, Hofstetter V, Hognabba F, Hollingsworth  
508 PM, Hong S-BS-BS-BS-B, Hosaka K, Houbraken J, Hughes K, Huhtinen S, Hyde  
509 KD, James T, Johnson EM, Johnson JE, Johnston PR, Jones EBG, Kelly LJ, Kirk  
510 PM, Knapp DG, Koljalg U, Kovacs GM, Kurtzman CP, Landvik S, Leavitt SD,  
511 Liggenstoffer a. S, Liimatainen K, Lombard L, Luangsa-ard JJ, Lumbsch HT,  
512 Maganti H, Maharachchikumbura SSN, Martin MP, May TW, McTaggart a. R,  
513 Methven a. S, Meyer W, Moncalvo J-M, Mongkolsamrit S, Nagy LG, Nilsson RH,  
514 Niskanen T, Nyilasi I, Okada G, Okane I, Olariaga I, Otte J, Papp T, Park D,  
515 Petkovits T, Pino-Bodas R, Quaedvlieg W, Raja H a., Redecker D, Rintoul TL,  
516 Ruibal C, Sarmiento-Ramirez JM, Schmitt I, Schussler A, Shearer C, Sotome K,  
517 Stefani FOP, Stenroos S, Stielow B, Stockinger H, Suetrong S, Suh S-O, Sung G-  
518 H, Suzuki M, Tanaka K, Tedersoo L, Telleria MT, Tretter E, Untereiner W a.,

- 519 Urbina H, Vagvolgyi C, Vialle A, Vu TD, Walther G, Wang Q-M, Wang Y, Weir  
520 BS, Weiss M, White MM, Xu J, Yahr R, Yang ZL, Yurkov A, Zamora J-C, Zhang  
521 N, Zhuang W-YW-Y, Schindel D. 2012. Nuclear ribosomal internal transcribed  
522 spacer (ITS) region as a universal DNA barcode marker for Fungi. *Proc Natl Acad*  
523 *Sci U S A* 109:1–6.
- 524 28. Oshero N, May GS. 1998. Optimization of protein extraction from *Aspergillus*  
525 *nidulans* for gel electrophoresis. *Fungal Genet Newsl* 45:38–40.
- 526 29. Woolstra O, Beck K, Oberegelsbacher C, Pfannstiel J, Huber A. 2010. Light-  
527 dependent phosphorylation of the *Drosophila* transient receptor potential ion  
528 channel. *J Biol Chem* 285:14275–14284.
- 529 30. Vizcaíno JA, Csordas A, Del-Toro N, Dianes JA, Griss J, Lavidas I, Mayer G, Perez-  
530 Riverol Y, Reisinger F, Ternent T, Xu QW, Wang R, Hermjakob H. 2016. 2016  
531 update of the PRIDE database and its related tools. *Nucleic Acids Res* 44:D447–  
532 D456.
- 533 31. Dingler C, Ladner W, Krei GA, Cooper B, Hauer B. 1996. Preparation of (R)-2-(4-  
534 Hydroxyphenoxy) propionic Acid by Biotransformation. *Pestic Sci* 46:33–35.
- 535 32. Grogan GJ, Holland HL. 2000. The biocatalytic reactions of *Beauveria* spp . *J Mol*  
536 *Catal B Enzym* 9:1–32.
- 537 33. Facey SJ, Nebel BA, Kontny L, Allgaier M, Hauer B. 2018. Rapid and complete  
538 degradation of diclofenac by native soil microorganisms. *Environ Technol Innov*  
539 10:55–61.
- 540 34. Webster R, Pacey M, Winchester T, Johnson P, Jezequel S. 1998. Microbial  
541 oxidative metabolism of diclofenac: Production of 4'-hydroxydiclofenac using



- 542 *Epicoccum nigrum* IMI354292. *Appl Microbiol Biotechnol* 49:371–376.
- 543 35. Quinn L, Dempsey R, Casey E, Kane A, Murphy CD. 2015. Production of drug  
544 metabolites by immobilised *Cunninghamella elegans*: from screening to scale up. *J*  
545 *Ind Microbiol Biotechnol* 42:799–806.
- 546 36. Xiao G, Ying S-H, Zheng P, Wang Z-L, Zhang S, Xie X-Q, Shang Y, St Leger RJ,  
547 Zhao G-P, Wang C, Feng M-G. 2012. Genomic perspectives on the evolution of  
548 fungal entomopathogenicity in *Beauveria bassiana*. *Sci Rep* 2:483.
- 549 37. He A, Rosazza JPN. 2003. Microbial transformations of S-naproxen by *Aspergillus*  
550 *niger* ATCC 9142. *Pharmazie* 58:420–422.
- 551 38. Di Nardo G, Dell'Angelo V, Catucci G, Sadeghi SJ, Gilardi G. 2015. Subtle  
552 structural changes in the Asp251Gly/Gln307His P450 BM3 mutant responsible for  
553 new activity toward diclofenac, tolbutamide and ibuprofen. *Arch Biochem Biophys*  
554 602:106–115.
- 555 39. Marco-Urrea E, Pérez-Trujillo M, Vicent T, Caminal G. 2009. Ability of white-rot  
556 fungi to remove selected pharmaceuticals and identification of degradation products  
557 of ibuprofen by *Trametes versicolor*. *Chemosphere* 74:765–772.
- 558 40. Kern F, Khatri Y, Litzemberger M, Bernhardt R. 2016. CYP267A1 and CYP267B1  
559 from *Sorangium cellulosum* so ce56 are highly versatile drug metabolizers. *Drug*  
560 *Metab Dispos* 44:495–504.
- 561 41. Neunzig I, Göhring A, Drăgan CA, Zapp J, Peters FT, Maurer HH, Bureik M. 2012.  
562 Production and NMR analysis of the human ibuprofen metabolite 3-  
563 hydroxyibuprofen. *J Biotechnol* 157:417–420.
- 564 42. Venkataraman H, Den Braver MW, Vermeulen NPE, Commandeur JNM. 2014.

565 Cytochrome P450-mediated bioactivation of mefenamic acid to quinoneimine  
566 intermediates and inactivation by human glutathione S-transferases. *Chem Res*  
567 *Toxicol* 27:2071–2081.

568 43. Capoferri L, Leth R, ter Haar E, Mohanty AK, Grootenhuis PDJ, Vottero E,  
569 Commandeur JNM, Vermeulen NPE, Jørgensen FS, Olsen L, Geerke DP. 2016.  
570 Insights into regioselective metabolism of mefenamic acid by cytochrome P450  
571 BM3 mutants through crystallography, docking, molecular dynamics, and free  
572 energy calculations. *Proteins Struct Funct Bioinforma* 84:383–396.

573 44. Osorio-Lozada A, Surapaneni S, Skiles GL, Subramanian R. 2008. Biosynthesis of  
574 drug metabolites using microbes in hollow fiber cartridge reactors: Case study of  
575 diclofenac metabolism by actinoplanes species. *Drug Metab Dispos* 36:234–240.

576 45. Tavanti M, Porter JL, Sabatini S, Turner NJ, Flitsch SL. 2018. Panel of New  
577 Thermostable CYP116B Self-Sufficient Cytochrome P450 Monooxygenases that  
578 Catalyze C–H Activation with a Diverse Substrate Scope. *ChemCatChem* 10:1042–  
579 1051.

580

## 581 **Table legends**

582

583 TAB 1

584 Summary of biotechnological processes to produce NSAID metabolites.

585 4'-hydroxydiclofenac (**2**); 5-hydroxydiclofenac (**3**); 5-hydroxyquinoneimine (**4**);

586 3',4'-dihydroxydiclofenac (**5**); 4',5-dihydroxydiclofenac (**15**); 6-*o*-desmethylnaproxen (**7**);

587 2-hydroxyibuprofen (**9**); 1-hydroxyibuprofen (**10**); 1,2-dihydroxyibuprofen (**11**);

588 3'-hydroxymethylmefenamic acid (**13**); 3'-carboxymefenamic acid (**14**); 2-Acetyl-6-  
589 methoxynaproxen (**16**); 7-hydroxynaproxen (**17**); 3',5-dihydroxymefenamic acid (**18**);  
590 3',6'-dihydroxymefenamic acid (**19**); 4'-hydroxymefenamic acid (**20**);  
591 5-hydroxymefenamic acid (**21**).

592

593

594

595

596

597

598

599

600

601

| Biocatalyst                                     | Product(s)                                                        | Process time <sup>a)</sup> / Scale | Product titer                    | Reference            |
|-------------------------------------------------|-------------------------------------------------------------------|------------------------------------|----------------------------------|----------------------|
| <b>Diclofenac (1)</b>                           |                                                                   |                                    |                                  |                      |
| <i>E. nigrum</i>                                | <b>2</b> (> 90%)                                                  | 2 d / 20 L (Reactor)               | 16 mg L <sup>-1 b)</sup>         | (34)                 |
| CYP267B1 ( <i>E. coli</i> )                     | <b>2</b>                                                          | 3 d / 50 mL                        | 24 mg L <sup>-1</sup>            | (40)                 |
| CYP105D7 ( <i>E. coli</i> )                     | <b>2</b>                                                          | 1.5 d / 0.5 mL                     | 44 mg L <sup>-1</sup>            | (22)                 |
| <i>C. elegans</i>                               | <b>2</b>                                                          | 18 d / 45 mL                       | 57 mg L <sup>-1 b)</sup>         | (35)                 |
| <i>B. bassiana</i>                              |                                                                   |                                    |                                  |                      |
| <i>C. nebularis</i>                             | <b>2, 3, 4, 5</b>                                                 | 7 d / 400 mL                       | 320 – 390 mg L <sup>-1 b)</sup>  | This study           |
| <i>M. hiemalis</i>                              |                                                                   |                                    |                                  |                      |
| CYP2C9 ( <i>S. pombe</i> )                      | <b>2</b>                                                          | 6 d / 1000 mL                      | 468 mg L <sup>-1 b)</sup>        | (14)                 |
| P450 BM3 variants <sup>c)</sup>                 | <b>2</b> (42%), <b>3</b> (58%)                                    | -                                  | 512 mg L <sup>-1 b)</sup>        | (19)                 |
| P450 RhF ( <i>E. coli</i> )                     | <b>3</b>                                                          | 2 d / 800 mL (Reactor)             | 357/ max. 580 mg L <sup>-1</sup> | (21)                 |
| <i>Actinoplanes</i> sp.                         | <b>2</b> (72%), <b>3</b> (18%), <b>15</b> (10%)                   | 5 d / 100 mL                       | 848 mg L <sup>-1 b)</sup>        | (44)                 |
| CYP116B64 ( <i>E. coli</i> )                    | <b>3</b>                                                          | 2 d / 100 mL                       | 1600 mg L <sup>-1</sup>          | (45)                 |
| <b>Naproxen (6)</b>                             |                                                                   |                                    |                                  |                      |
| P450 BM3 variants <sup>c)</sup>                 | <b>7</b> (66%), <b>16</b> (34%)                                   | -                                  | Max. 144 mg L <sup>-1 b)</sup>   | (19)(20)             |
| <i>A. niger</i>                                 | <b>7</b> (73%), <b>17</b> (27%)                                   | 2.5 d / 200 mL                     | 220 mg L <sup>-1 b)</sup>        | (37)                 |
| <i>M. hiemalis</i>                              | <b>7</b>                                                          | 4 d / 50 mL                        | 980 mg L <sup>-1 b)</sup>        | This study           |
| <b>Ibuprofen (8)</b>                            |                                                                   |                                    |                                  |                      |
| Microorganisms and heterologous expressed P450s | <b>9, 10, 11</b>                                                  | -                                  | < 30 mg L <sup>-1 b)</sup>       | (41)(39)<br>(40)(25) |
| P450 BM3 variants <sup>c)</sup>                 | <b>9</b>                                                          | -                                  | 400 mg L <sup>-1 b)</sup>        | (20)                 |
| <i>M. hiemalis</i>                              | <b>9</b> (90%), <b>10</b> (2%), <b>11</b> (8%)                    | 4 d / 50 mL                        | 990 mg L <sup>-1 b)</sup>        | This study           |
| <b>Mefenamic acid (12)</b>                      |                                                                   |                                    |                                  |                      |
| <i>P. sordida</i>                               | <b>13</b> (67%), <b>14</b> (13%), <b>18</b> (17%), <b>19</b> (3%) | 7 d / 200 mL                       | > 3 mg L <sup>-1 b)</sup>        | (26)                 |
| P450 BM3 variants <sup>c)</sup>                 | <b>13</b> (40%), <b>20</b> (55%), <b>21</b> (5%)                  | -                                  | 216 mg L <sup>-1 b)</sup>        | (18)(43)             |
| <i>B. bassiana</i>                              | <b>13</b> (68%), <b>14</b> (32%)                                  | 4 d / 50 mL                        | 520 mg L <sup>-1 b)</sup>        | This study           |

<sup>a)</sup> The duration of the process includes cultivation of the main culture, expression (recombinant produced P450s) and subsequent biotransformation in days (d).

<sup>b)</sup> The product titer was calculated from isolated yields.

<sup>c)</sup> Purified enzyme (*in vitro*).

602

603

604 TAB 2

605 Results of the proteome analysis of the biotransformations with *Beauveria bassiana* carried  
606 out with different substrates. The numbers stand for the quantity of clearly attributable  
607 peptide fragments to a protein. A higher number contributes to a higher probability that the  
608 protein is actually present in the sample. A sample with glucose as substrate served as a  
609 reference.

|                         | Glucose   | Diclofenac ( <b>1</b> ) | ( <i>R</i> )-2-<br>phenoxypropionic<br>acid |
|-------------------------|-----------|-------------------------|---------------------------------------------|
| NADPH-CYP-<br>Reductase | <b>14</b> | <b>9</b>                | <b>10</b>                                   |
| CYP52A10                | <b>2</b>  | 0                       | <b>11</b>                                   |
| CYP52A13                | <b>5</b>  | 0                       | 0                                           |
| CYP548A5                | 0         | <b>5</b>                | 0                                           |
| CYP51F1                 | 0         | <b>1</b>                | 0                                           |
| CYP684A2                | 0         | 0                       | <b>2</b>                                    |

610

611

612

613

614

615

616

617

618

619

620 **Figure legends**

621

622 FIG 1

623 Diclofenac (**1**) biotransformations with the filamentous fungi *Beauveria bassiana*,  
624 *Clitocybe nebularis* and *Mucor hiemalis*. The reactions were carried out in 400 mL of PEG  
625 broth with 0.6 g L<sup>-1</sup> substrate for 144 h at 27°C and 180 rpm. **Red**: negative control without  
626 cells; **Magenta**: standard of 4'-hydroxydiclofenac (**2**), 5-hydroxydiclofenac (**3**) and  
627 5-hydroxyquinoneimine (**4**); **Green**: *Beauveria bassiana*; **Blue**: *Mucor hiemalis*; **Ocher**:  
628 *Clitocybe nebularis*. The retention times for the different metabolites are: 11.9 min (**5**);  
629 13.1 min (**4**); 13.3 min (**2** and **3**); 15.5 min (**1**).

630

631 SCHEME 1

632 Diclofenac metabolites (**2 – 5**) synthesized by different filamentous fungi as biocatalyst  
633 using 0.6 g L<sup>-1</sup> substrate. The isolated yields after extraction and purification *via* semi-  
634 preparative HPLC and the product distribution in brackets are given. The metabolites  
635 4'-hydroxydiclofenac (**2**), 5-hydroxydiclofenac (**3**), 5-hydroxyquinoneimine (**4**),  
636 3',4'-dihydroxydiclofenac (**5**) were identified by NMR. <sup>a)</sup>Not yet observed diclofenac  
637 metabolite.

638

639 SCHEME 2

640 NSAID-metabolites synthesized by different filamentous fungi as biocatalyst using 1 g L<sup>-1</sup>  
641 substrate. The isolated yields after extraction and purification *via* semi-preparative HPLC  
642 and the product distribution in brackets are given. The metabolites 6-*o*-desmethylnaproxen

643 (7), 2-hydroxyibuprofen (9), 1-hydroxyibuprofen (10), 1,2-dihydroxyibuprofen (11),  
644 3'-hydroxymethylmefenamic acid (13) and 3'-carboxymefenamic acid (14) were identified  
645 by NMR. <sup>a</sup>)Products were not purified; hence no isolated yield and exact products are given.  
646

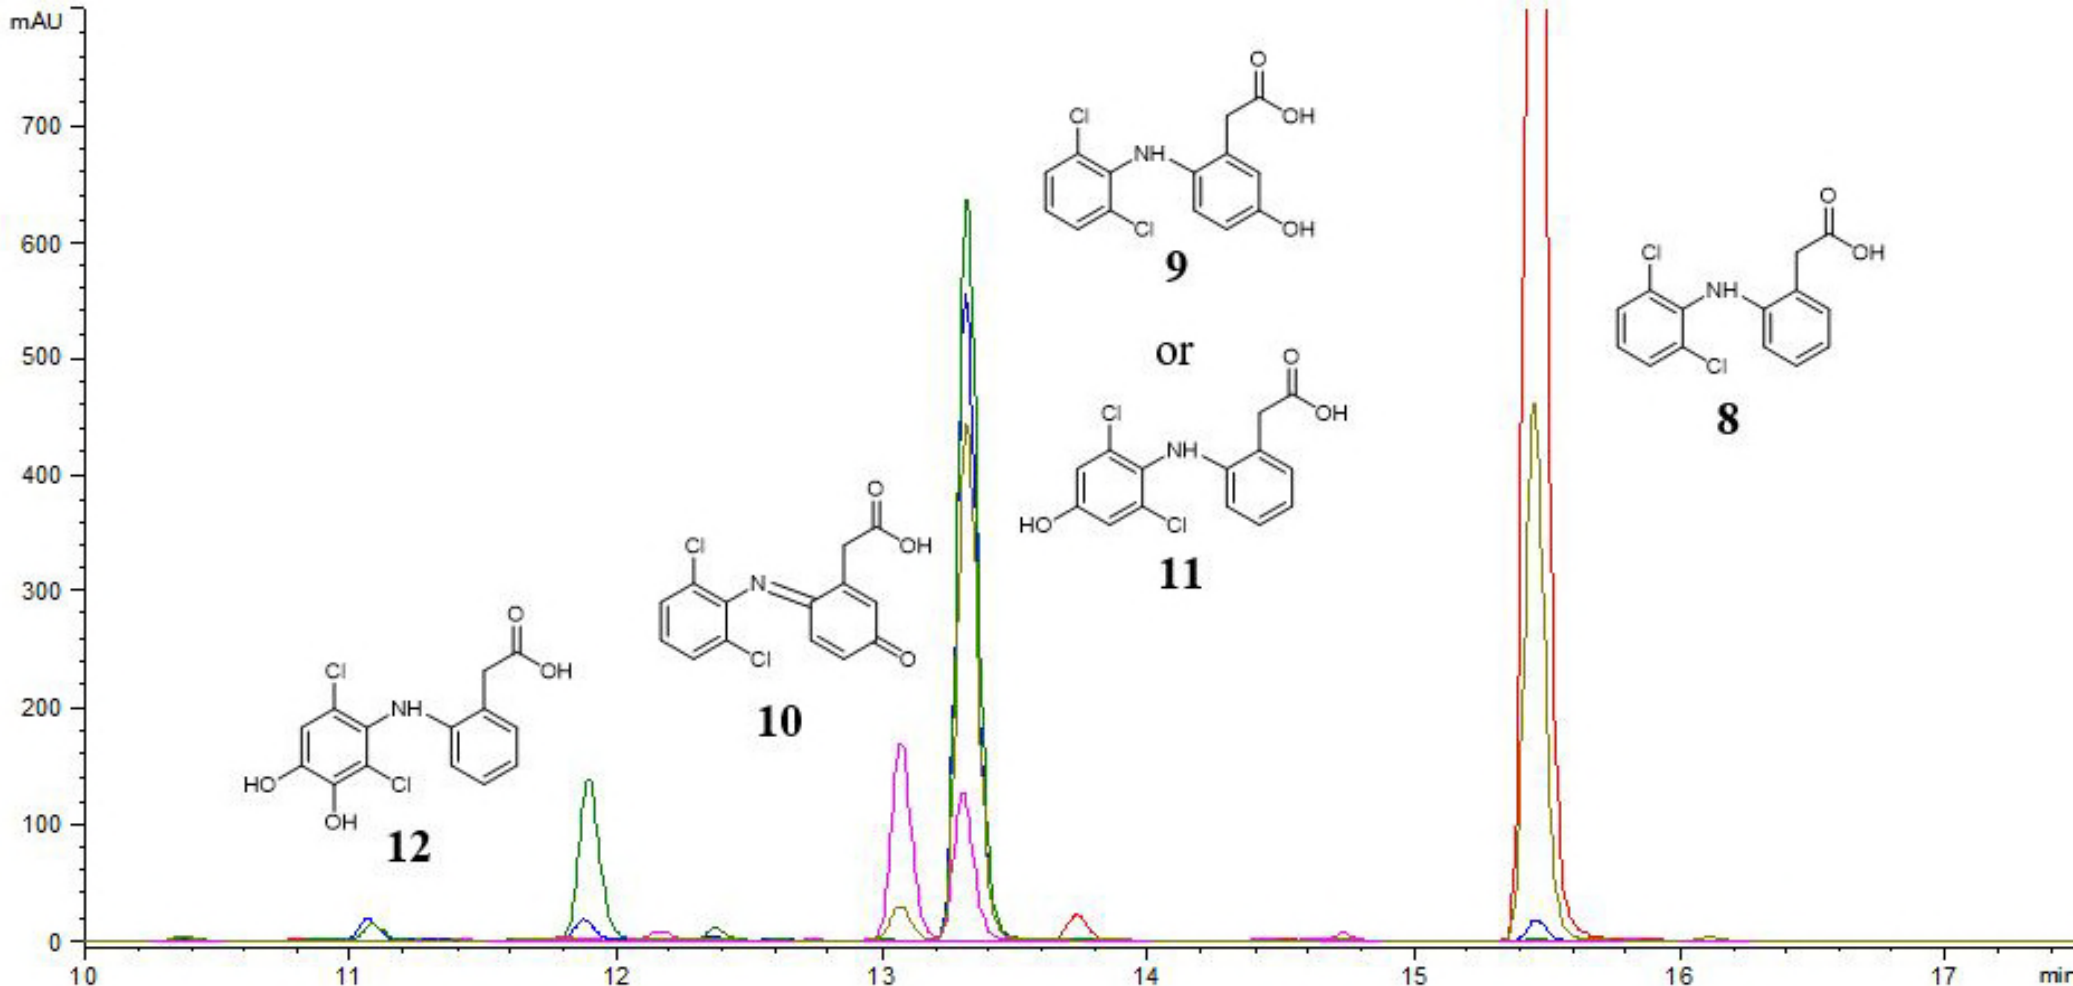



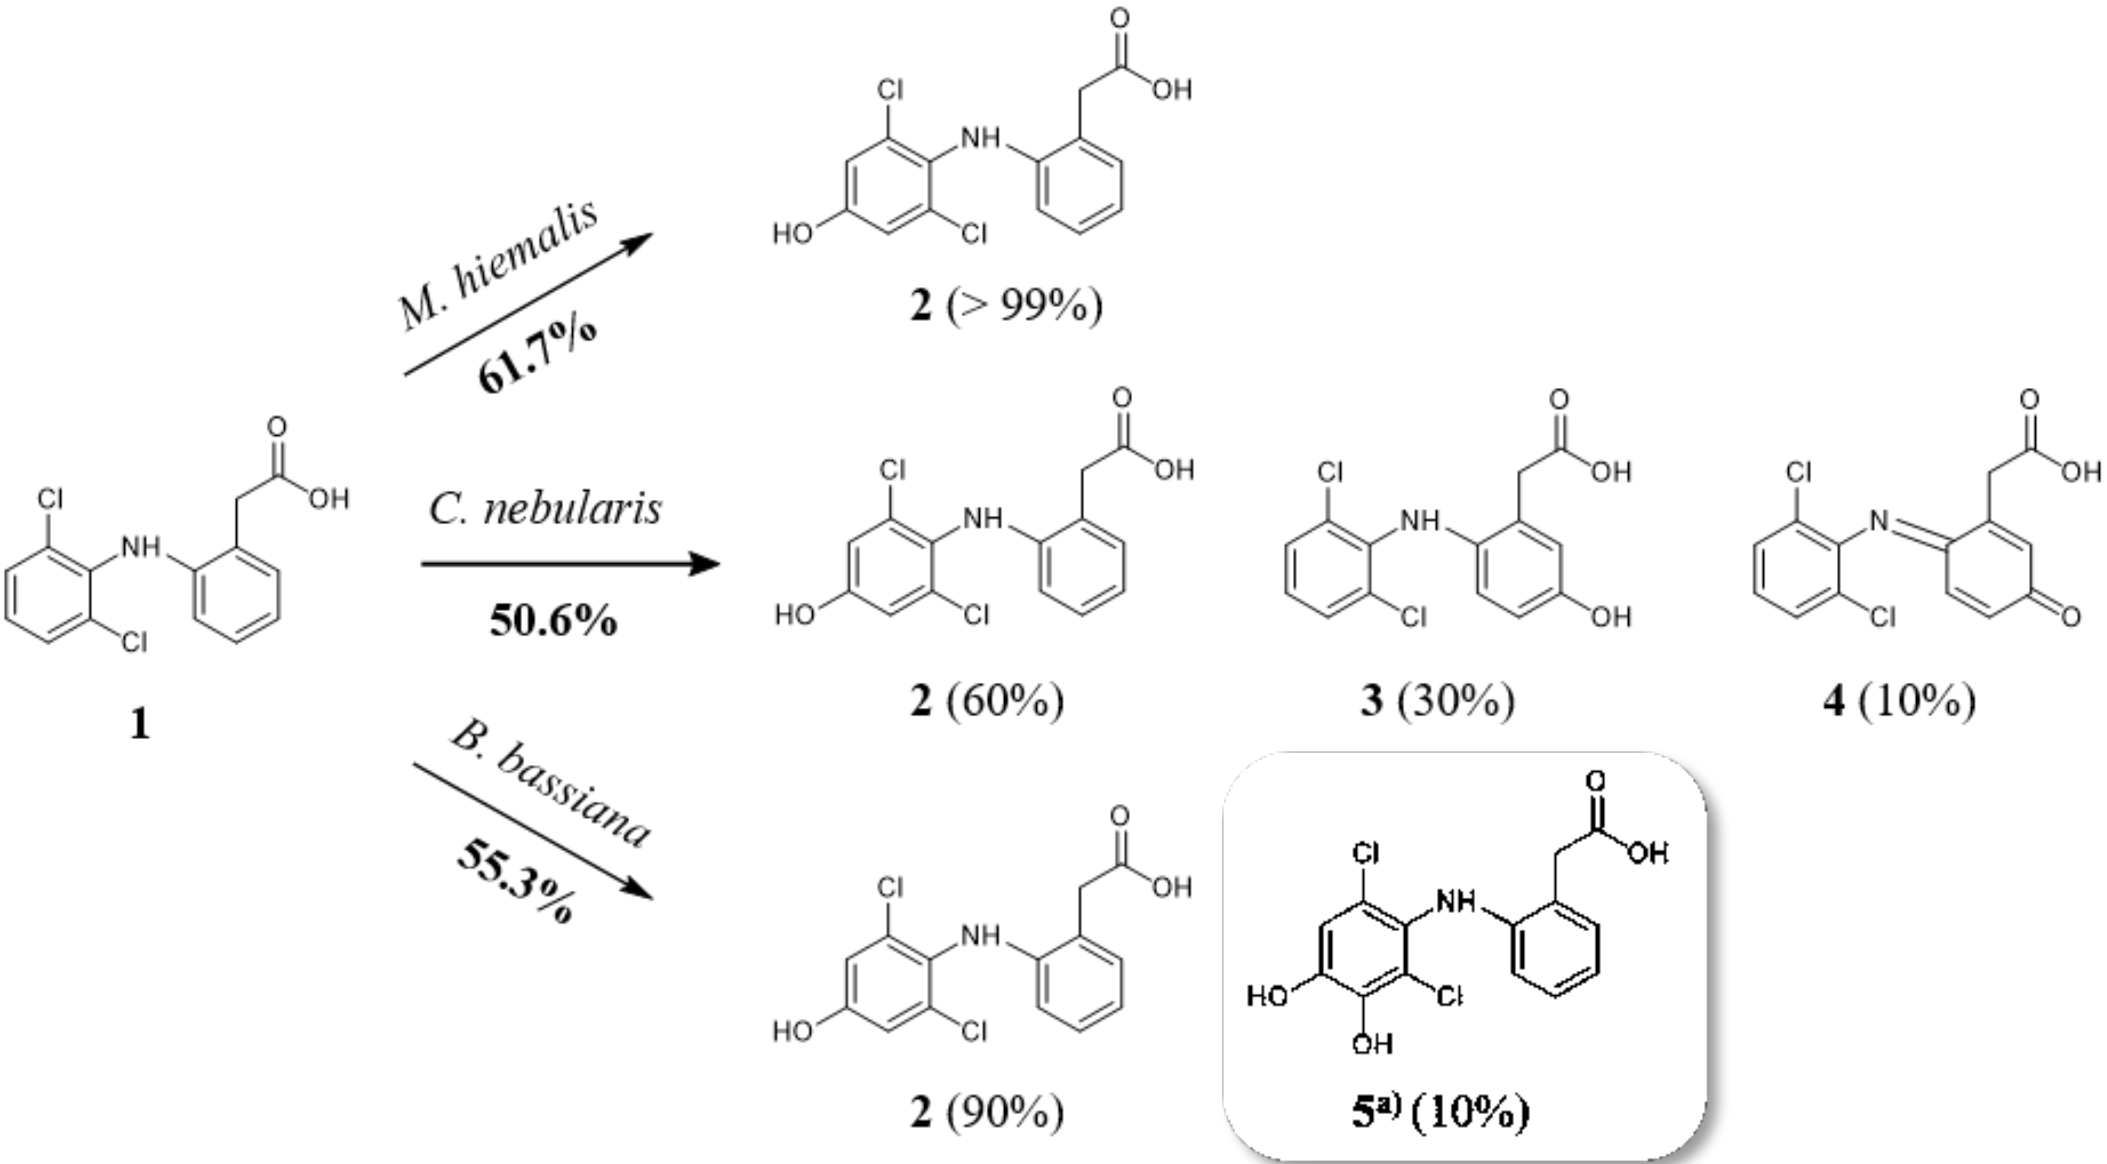

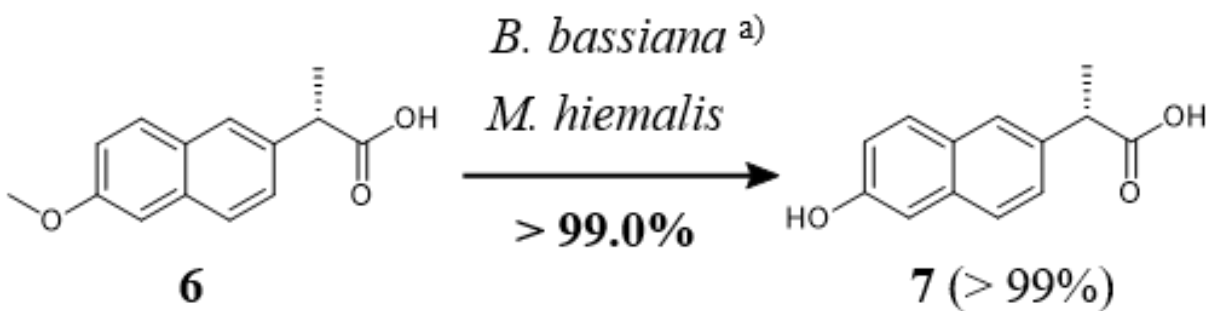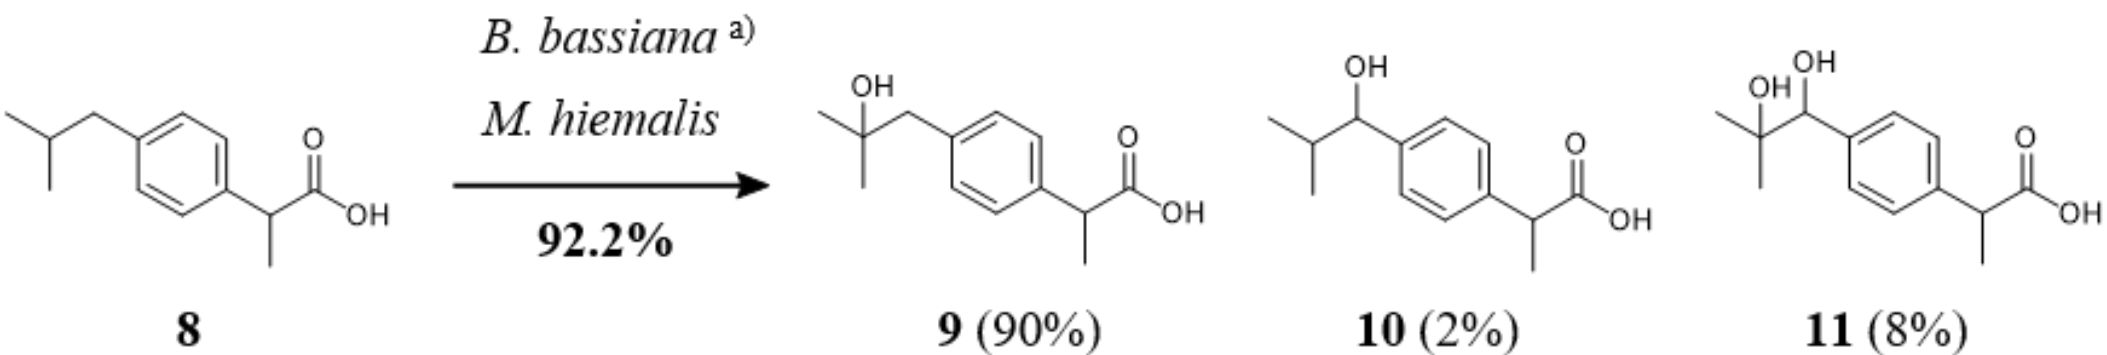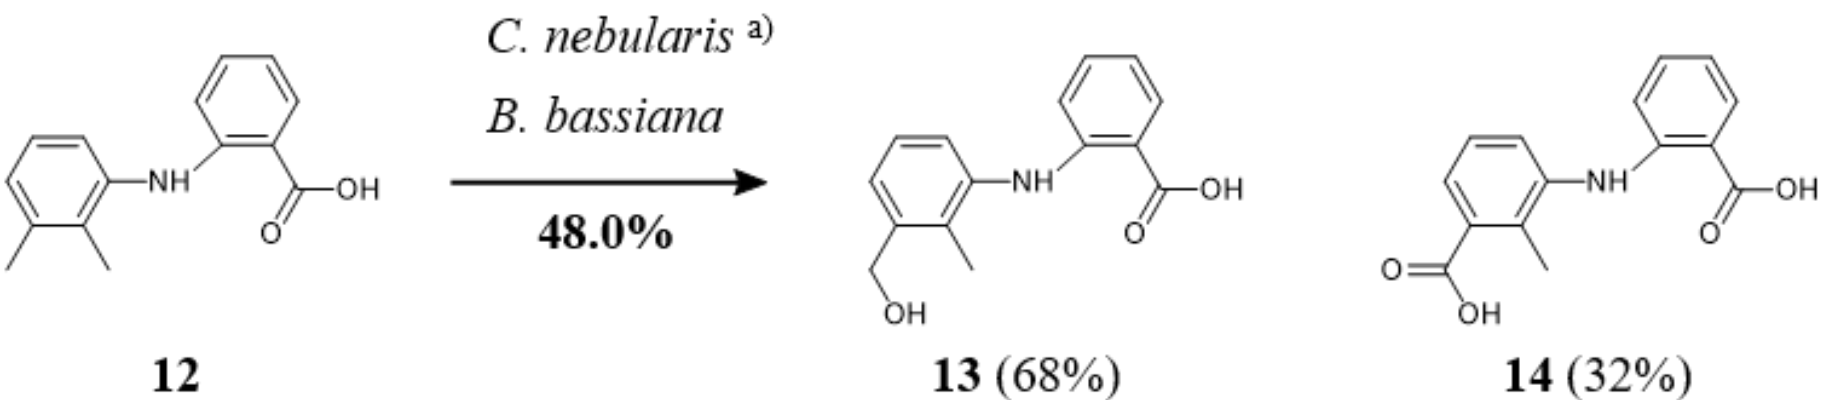

Source: https://www.biorxiv.org/content/10.1101/315374v1.full.pdf
